# Supplementary material for: Patterns and rates of soil movement and shallow failures across several small watersheds on the Seward Peninsula, Alaska
Source: Copernicus journal article supplement (doi:10.5194/esurf-11-227-2023), 2023-03-24
Supplement: Supplementary file 1 [file esurf-11-227-2023-supplement.zip]

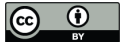

## *Supplement of*

# **Patterns and rates of soil movement and shallow failures across several small watersheds on the Seward Peninsula, Alaska**

**Joanmarie Del Vecchio et al.**

*Correspondence to:* Joanmarie Del Vecchio (joanmarie@dartmouth.edu)

- esurf-11-227-2023-supplement-title-page.pdf
- delvecchio\_supplement\_january
  - 2018\_failure\_stats.csv
  - 2019\_failure\_stats.csv
  - Del\_Vecchio\_ESurf\_supplement\_edits.pdf
  - earthflow\_stats.csv
  - trib\_failure\_stats.csv

The copyright of individual parts of the supplement might differ from the article licence.
