# Supplementary material for: Patterns and rates of soil movement and shallow failures across several small watersheds on the Seward Peninsula, Alaska
Source: Copernicus journal article supplement (doi:10.5194/esurf-11-227-2023), 2023-03-24
Supplement: Supplementary file 2 [file esurf-11-227-2023-supplement.zip]

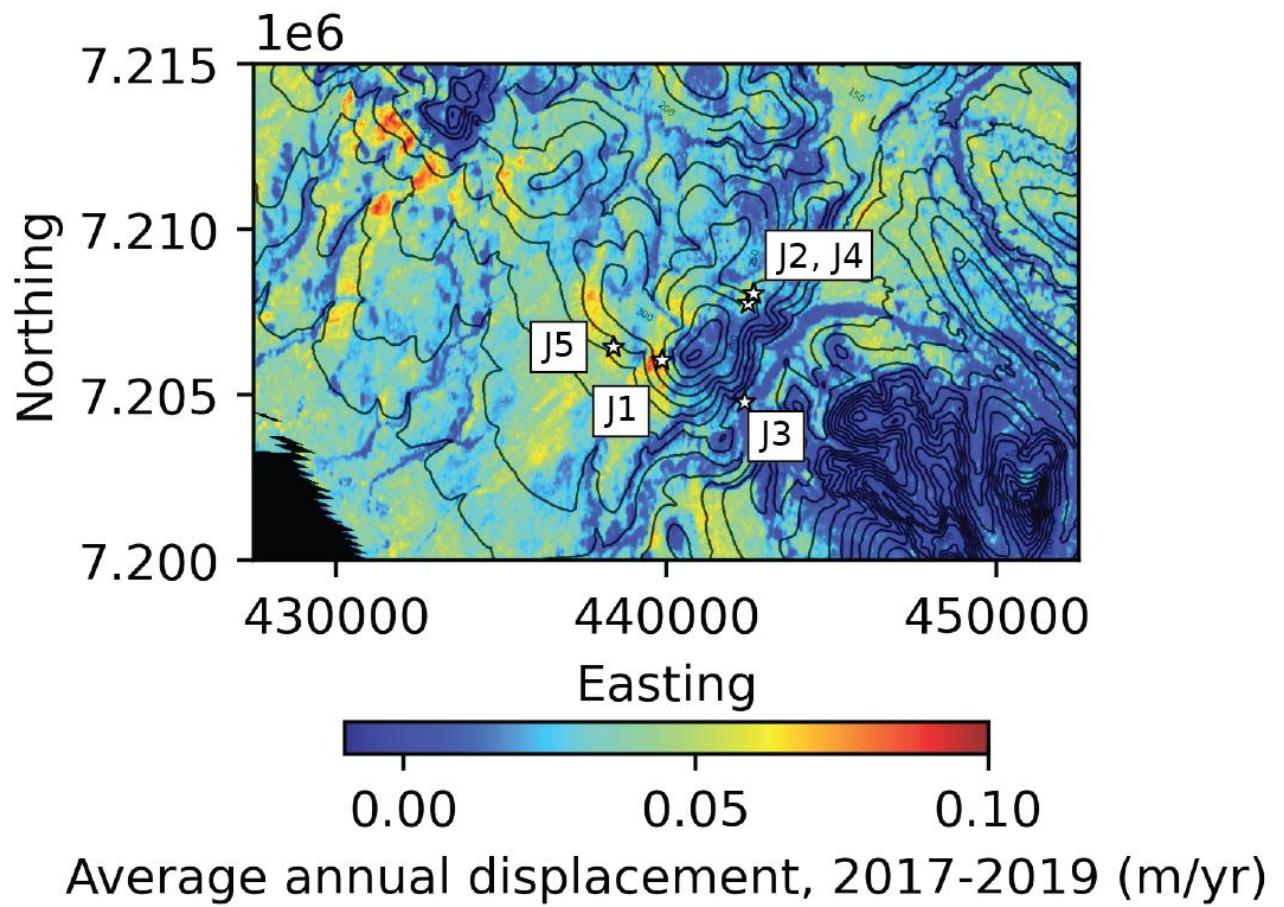

1

2 Fig. S1: InSAR average displacements with hillslope site locations noted. Contours are metres

3 above sea level every 50 m.

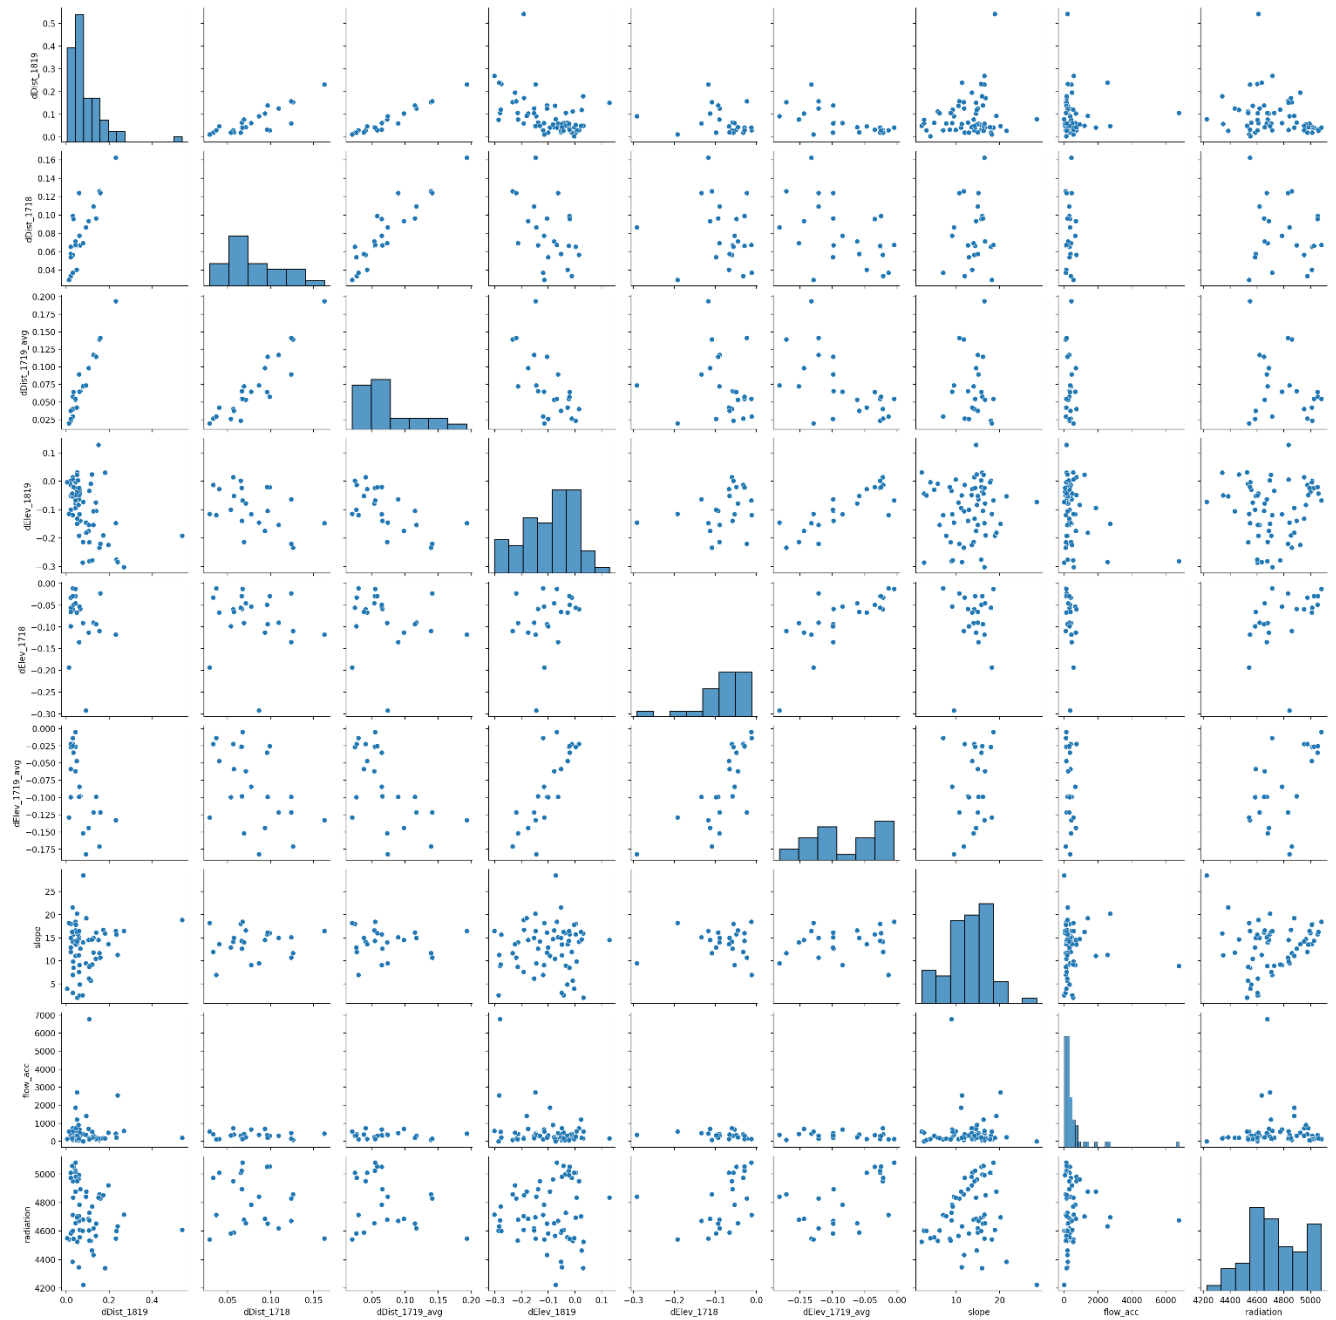

Figure S2: Pairplot of relationship between yearly vertical and horizontal DGPS-derived displacements as well as terrain attributes as described in the text. “dElev” denotes change in elevation, “dDist” denotes change in distance.

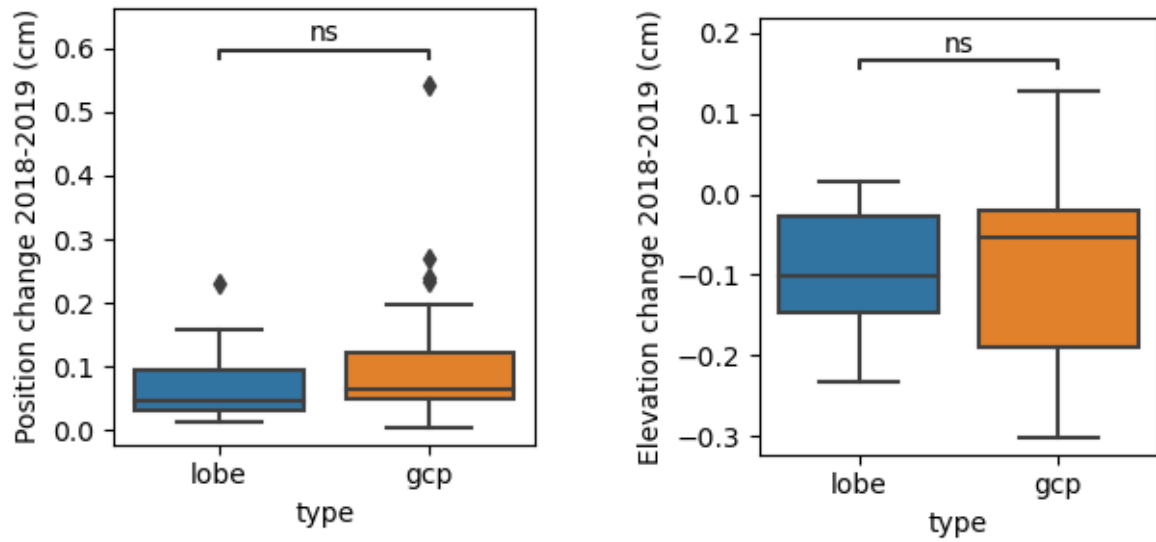

Figure S3: Statistical test for significance in movement of lobe and ground control points (GCPs). The p-value for position change is 0.1149 and the p-value for elevation change is 0.9846 (ns:  $p > 0.05$ ).

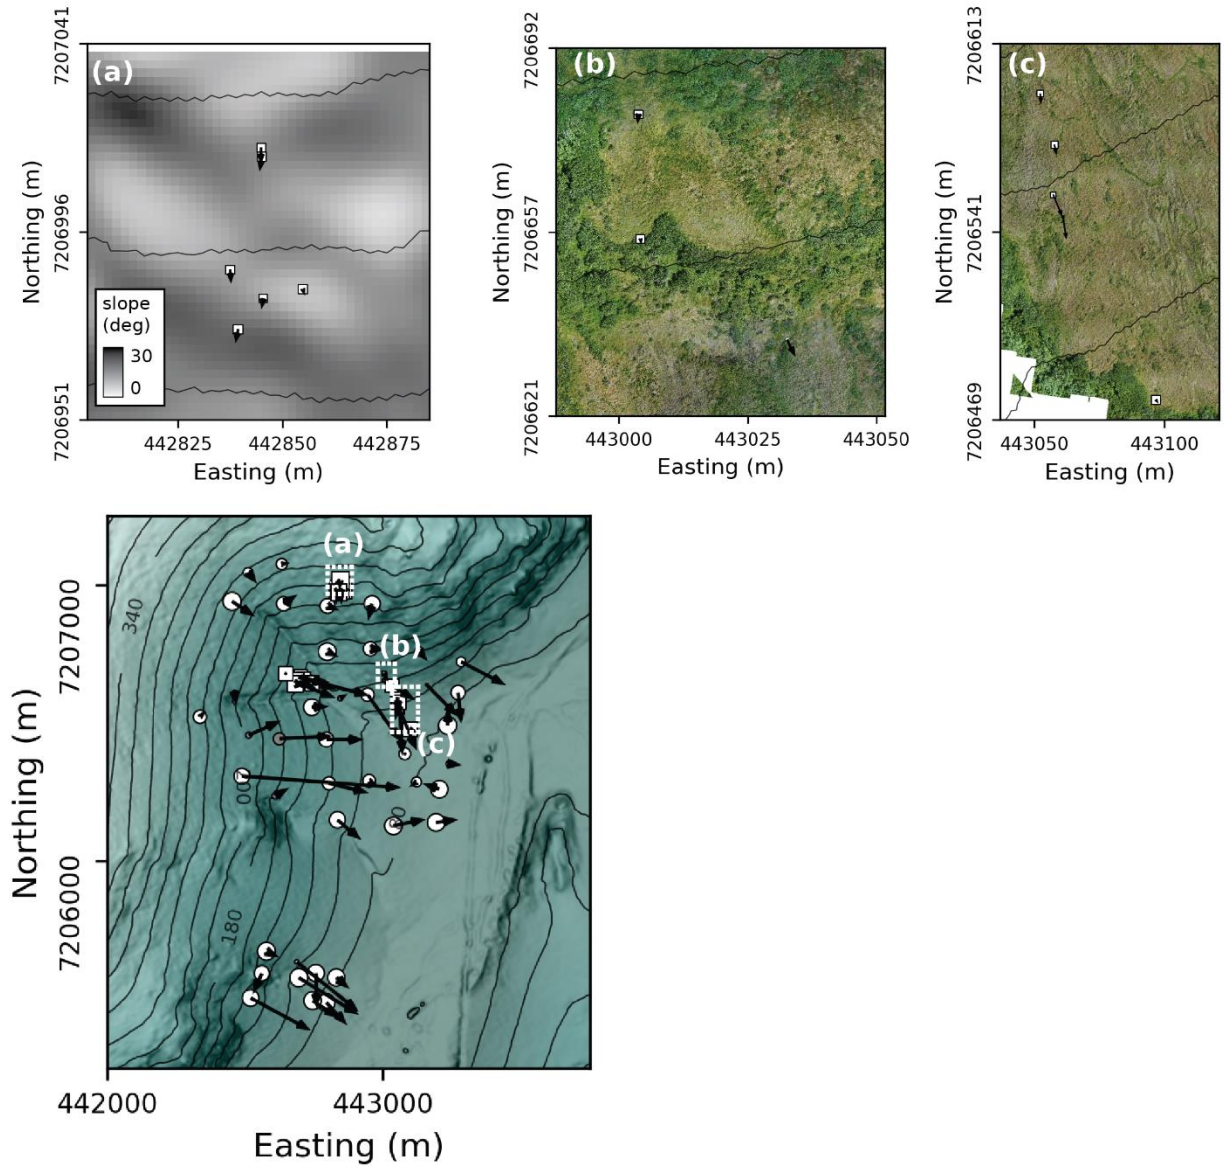

13

14 Fig. S4: Zoom-ins to lobe target clusters demonstrating the spatial variability in displacement. (a)  
 15 data overlay an ArcticDEM slopeshade; (b) and (c) are UAV imagery. The locations of each  
 16 cluster are shown in the reproduction of Figure 3(a).
